# Supplementary material for: A nanostructured micellar diblock copolymer layer affects the memory characteristics and packing of pentacene molecules in non-volatile organic field-effect transistor memory devices
Source: Royal Society of Chemistry journal article supplement (doi:10.1039/c3tc00362k), 2013-01-01
Supplement: c3tc00362k.pdf [file c3tc00362k.pdf]

Electronic Supplementary Information (ESI)

# Nanostructured Micellar Diblock Copolymer Layer Affect the Memory Characteristics and Packing of Pentacene Molecules in Non-Volatile Organic Field-Effect Transistor Memories

*Chia-Min Chen, Chih-Ming Liu, Ming-Chang Tsai, Hsiu-Cheng Chen, Kung-Hwa Wei\**

Department of Materials Science and Engineering, National Chiao Tung University,

Hsinchu 30049, Taiwan

\*Corresponding author. E-mail: [khwei@mail.nctu.edu.tw](mailto:khwei@mail.nctu.edu.tw) (KHW)

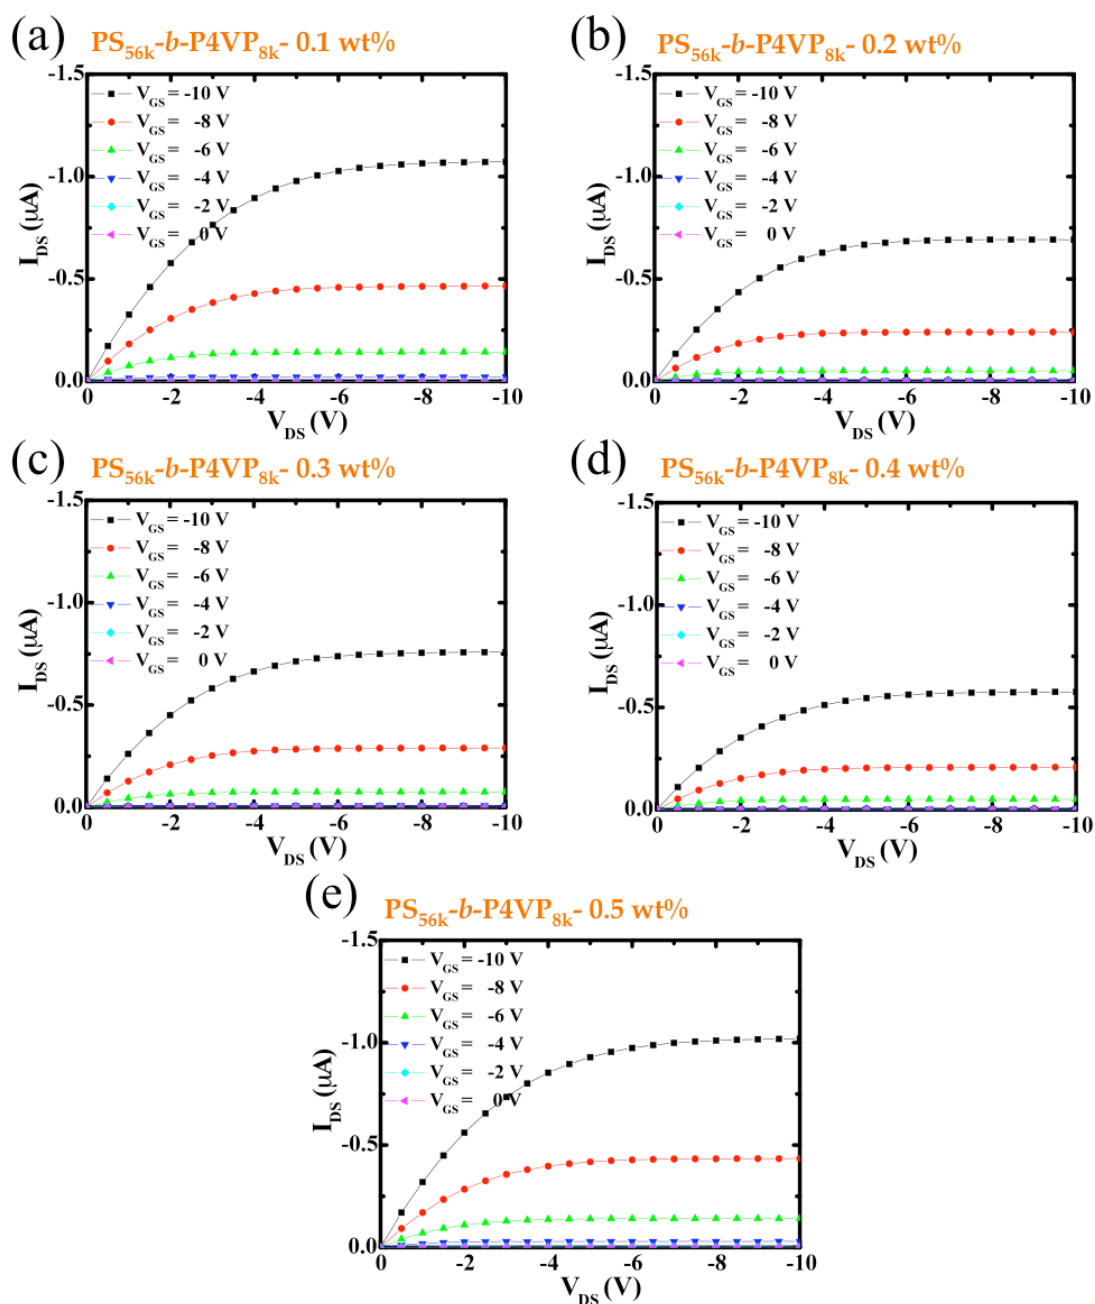

**Fig. S1.** Output characteristics of the OFET-type memory devices incorporating the  $PS_{56k}-b-P4VP_{8k}$  micellar layers that were spun at different solution concentration (a) 0.1, (b) 0.2, (c) 0.3, (d) 0.4, and (e) 0.5 wt%.
